# Supplementary material for: Impact of Water Shortage on Soil and Plant Attributes in the Presence of Arbuscular Mycorrhizal Fungi from a Harsh Environment
Source: MDPI journal article supplement (doi:10.3390/microorganisms11051144), 2023-04-28
Supplement: s1 [file s1]

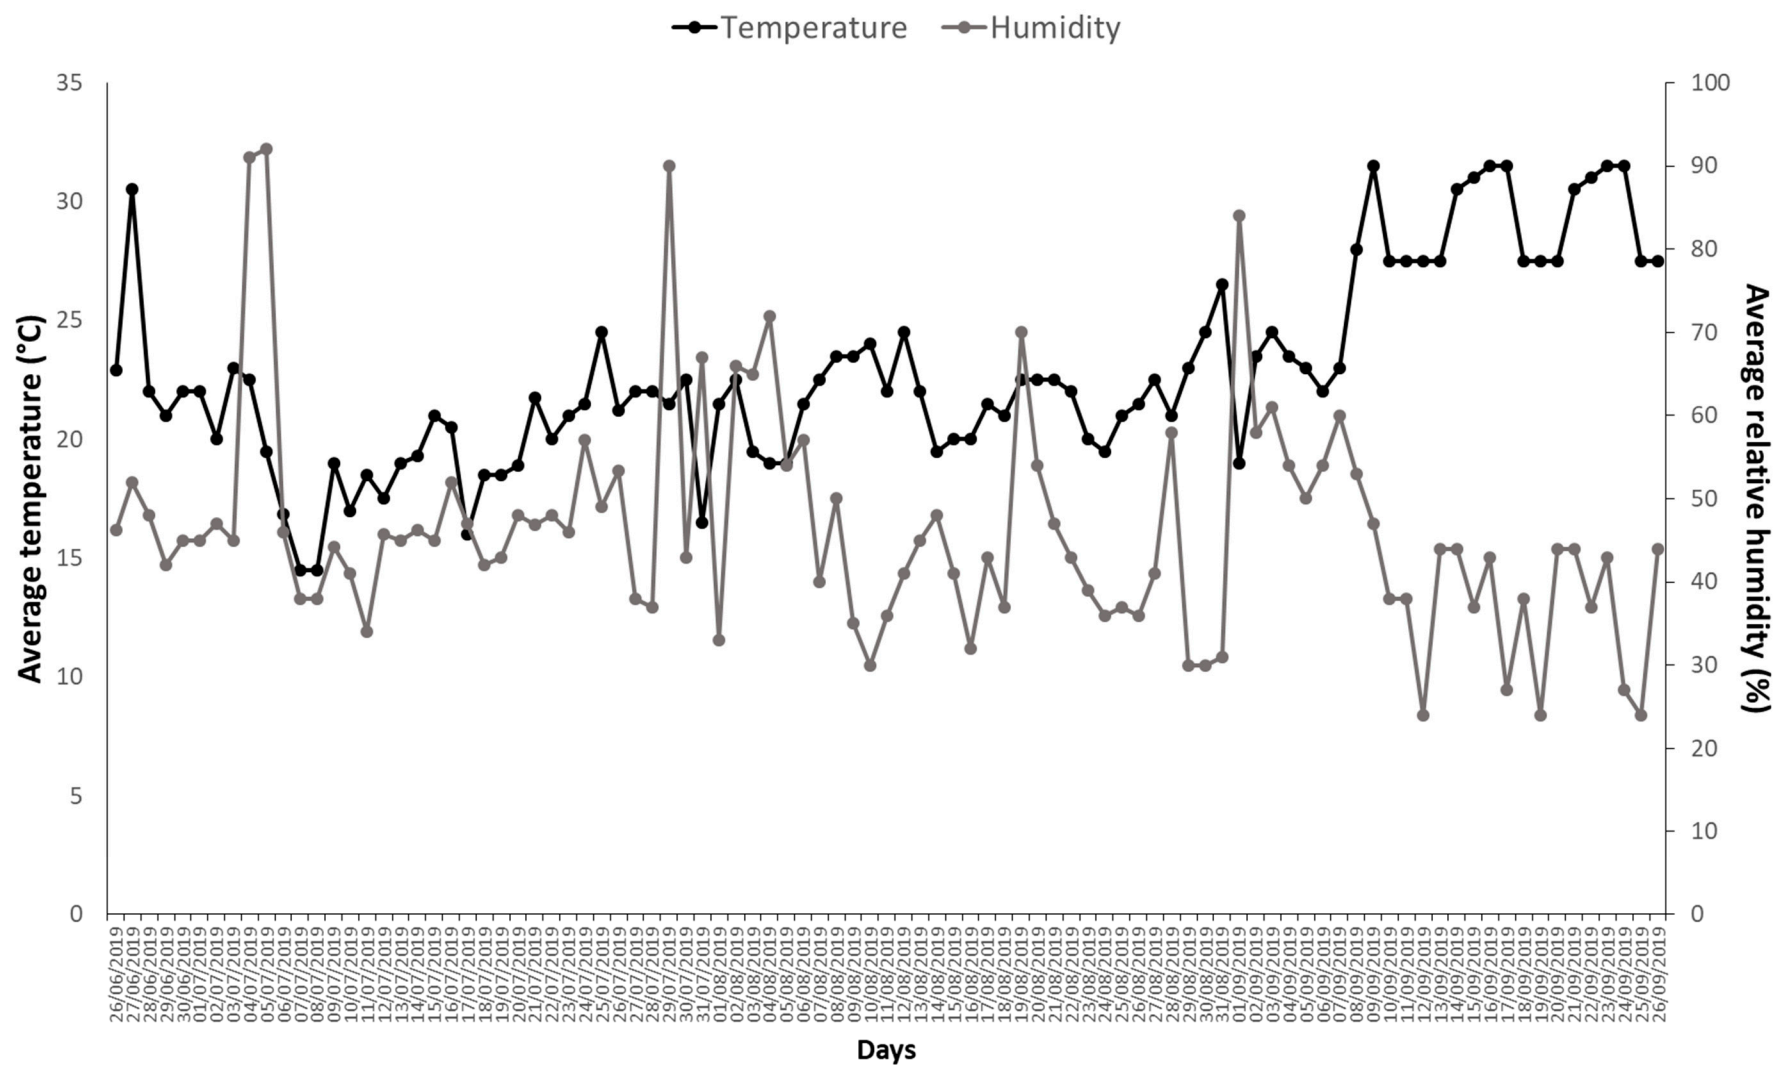

Figure S1. Daily average temperature and relative humidity in greenhouse from June 26 to September 26.

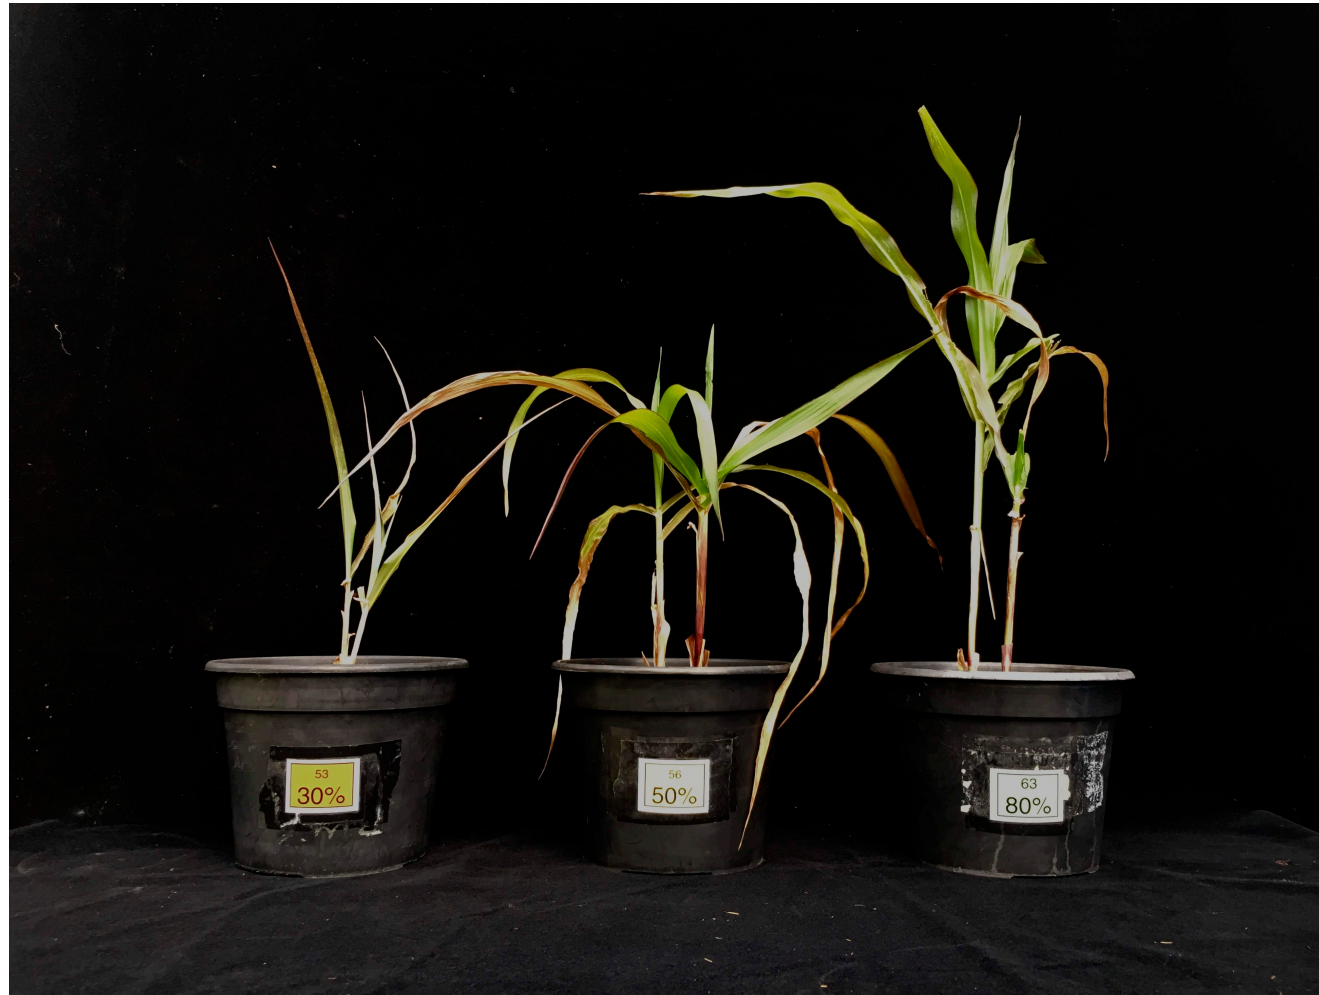

**Figure S2.** Mesocosm experiment using a pool of arbuscular mycorrhizal fungi under varying drought levels. On the left side, the pot with 30 % of the water-holding capacity (WHC) simulates severe drought, in the middle (50 % of the WHC) pot simulates moderate drought, and on the right side the control treatment under no drought (80 % of the WHC).
